# Supplementary material
Source: PubMed Central journal article supplement (PMC2844318)
Supplement: supp_123_7_1099__1.pdf [file supp_123_7_1099__1.pdf]

## PDZ 1 domain

```
M.musculus 13 RLCCLEK--GPNGYGFHLHGEKGVKGFQFIRLVEPGSPA EKSGLLAGDRLVEVNGENVEKETHQQVVSRI RAALNAVRLLVV 91
R.norvegicus 13 RLCCLEK--GPNGYGFHLHGEKGVKGFQFIRLVEPGSPA EKSGLLAGDRLVEVNGENVEKETHQQVVSRI RAALNAVRLLVV 91
H.sapiens 13 RLCCLEK--GPNGYGFHLHGEKGVKGLQYIIRLVEPGSPA EKAGLLAGDRLVEVNGENVEKETHQQVVSRI RAALNAVRLLVV 91
C.elegans 12 RLCVVEKLNGENEYGYNLHAEKG-RGQFVGTVDPS PAERGGLI TGDRI FAVNGHSI IGENHKKVVERI KANPNRCEMLVI 91
Drosophila 21 KTCHIVKRPDFDGYGFNLHSEKVKPGQF IGKVDADSPA EAAGLKEGDRILEVNGVSI GSETHKQVVAR IKAIANEVRLLLI 101
```

## PDZ 2 domain

```
M. musculus 152 MKKGP--NGYGFNLHSDKSKPGQFIRAVDPDSPA EASGLRAQDRIVEVNGVCMEGKQ-HGDVVS AIKGGDEAKLLVV 226
R. norvegicus 154 MKKGP--NGYGFNLHSDKSKPGQFIRAVDPDSPA EASGLRAQDRIVEVNGVCMEGKQ-HGDVVS AIKAGGDEAKLLVV 228
H.sapiens 157 MKKGP--SGYGFNLHSDKSKPGQFIRSVDPDSPA EASGLRAQDRIVEVNGVCMEGKQ-HGDVVS AIRAGGDETKLLVV 231
Drosophila 25 IVKRPDFDGYGFNLHSEKVKPGQF IGKVDADSPA EAAGLKEGDRILEVNGVSI GSET-HKQVVAR IKAIANEVRLLLI 101
C.elegans 181 -----AGLEAGQRIVGVNGQLIYPTTGHKEVVALI KKDTMKTLLVA 222
```

## EB domain

```
M.musculus 320 LNI SLAVAKERAHQKRSSKRAP---QMDWSKKNELFSNL 355
R.norvegicus 321 FNI SLAVAKERAHQKRSSKRAP---QMDWSKKNELFSNL 356
H.sapiens 323 FNI SLAMAKERAHQKRSSKRAP---QMDWSKKNELFSNL 358
C.elegans 432 YHLSAREARERLRMKNRKHHHLH---EMSLNEKYQLVSNM 467
Drosophila 258 LHL PMTAAEMRAKLASKKKYDPKNE SVDLKKKFDI IQKL 296
```
