# Supplementary material
Source: PubMed Central journal article supplement (PMC2844318)

pERM

a-Sip1

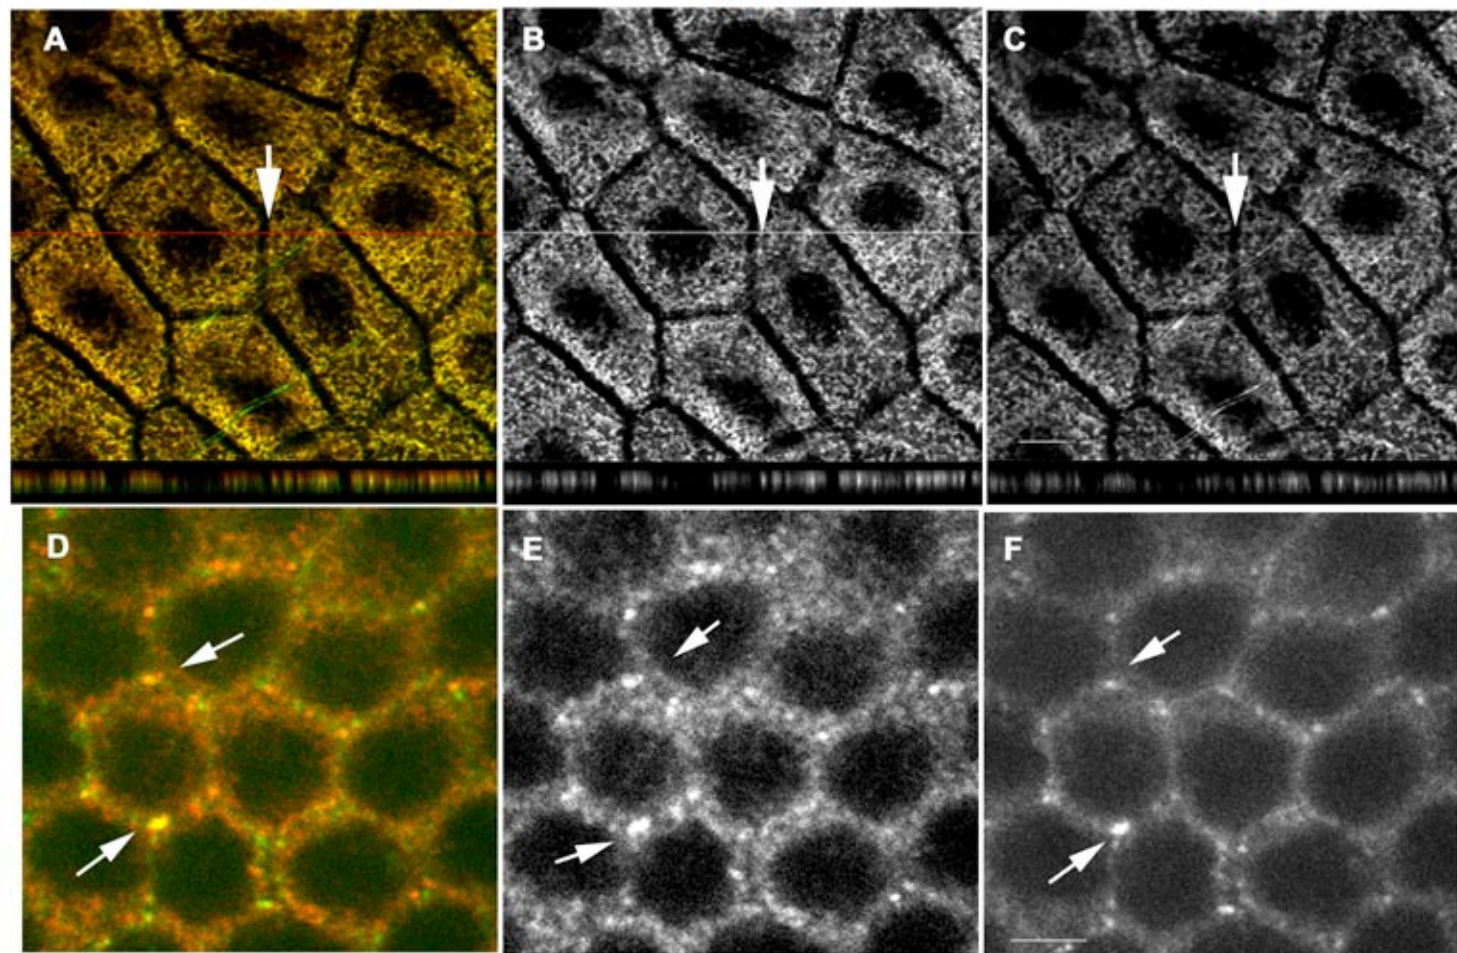

Supplement: supp_123_7_1099__2.pdf [file supp_123_7_1099__2.pdf]
